# Supplementary material for: Anionic Hyperbranched Amphiphilic Polyelectrolytes as Nanocarriers for Antimicrobial Proteins and Peptides
Source: MDPI journal article supplement (doi:10.3390/ma16247702), 2023-12-18
Supplement: s1 [file s1]

## Supplementary Information

**Table S1:** DLS data for filtered and non-filtered samples of HHC 2

| HHC 2                 | $I_{90^\circ}$ (a.u.) | $R_h$ (nm) | PDI  |
|-----------------------|-----------------------|------------|------|
| Sample 1/FILTERED     | 30                    | 5          | 0.47 |
| Sample 2/FILTERED     | 42                    | 8          | 0.49 |
| Sample 1/NON-FILTERED | 35                    | 5          | 0.40 |
| Sample 2/NON-FILTERED | 32                    | 5          | 0.48 |

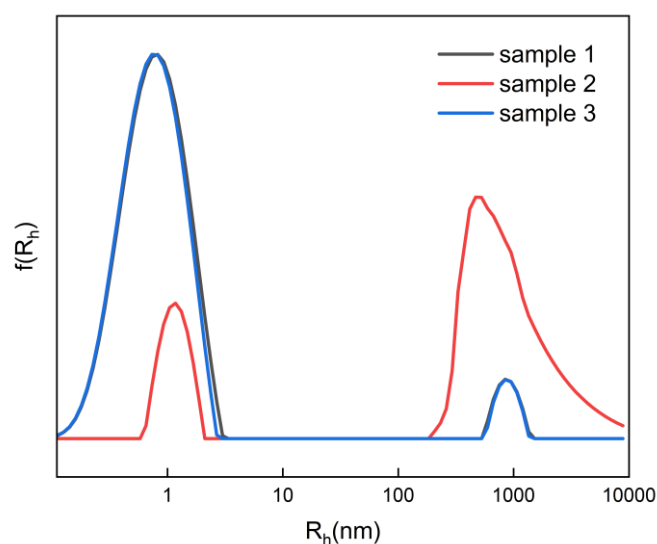

**Figure S1:** DLS results for neat LYZ samples of various concentrations.

**Table S2:** DLS data for neat LYZ samples of various concentrations.

| LYZ                                     | $I_{90^\circ}$ (a.u.) | $R_h$ (nm)         | PDI  |
|-----------------------------------------|-----------------------|--------------------|------|
| Sample 1/C= $6.57 \times 10^{-4}$ g/mL  | 19                    | 1 (75%)/ 872 (25%) | 0.47 |
| Sample 2/C= $13.04 \times 10^{-4}$ g/mL | 18                    | 1 (24%)/ 831 (76%) | 0.55 |
| Sample 3/C= $6.52 \times 10^{-4}$ g/mL  | 15                    | 1 (75%)/ 870 (25%) | 0.41 |

The raw data utilized for the calculations regarding the toxicity assay are presented below.

A: number of tested units (shrimps)

B: number of survived units after 18 h

C: number of survived units after 24 h

**Table S3:** Obtained data from lethality experiments for neat units.

|   |    |    |   |   |   |   |   |    |
|---|----|----|---|---|---|---|---|----|
| A | 11 | 12 | 8 | 6 | 8 | 7 | 9 | 13 |
| B | 8  | 8  | 7 | 6 | 7 | 7 | 8 | 9  |
| C | 5  | 6  | 6 | 6 | 4 | 7 | 5 | 7  |

**Table S4:** Obtained data from lethality experiments for HHC 1.

|   |    |   |   |   |   |   |   |    |
|---|----|---|---|---|---|---|---|----|
| A | 11 | 9 | 7 | 5 | 7 | 7 | 9 | 14 |
| B | 9  | 6 | 6 | 4 | 6 | 5 | 6 | 9  |
| C | 5  | 4 | 6 | 2 | 6 | 5 | 5 | 9  |

**Table S5:** Obtained data from lethality experiments for HHC 3.

|   |   |   |   |    |    |   |   |    |   |   |   |
|---|---|---|---|----|----|---|---|----|---|---|---|
| A | 7 | 5 | 8 | 15 | 11 | 7 | 6 | 15 | 7 | 8 | 8 |
| B | 7 | 2 | 8 | 14 | 9  | 5 | 6 | 11 | 6 | 5 | 4 |
| C | 7 | 2 | 8 | 11 | 9  | 4 | 5 | 9  | 6 | 5 | 4 |
